# Supplementary material
Source: HighWire-hosted journal article supplement (https://erj.ersjournals.com/content/55/3/1901526)
Supplement: inline-supplementary-material-2 [file inline-supplementary-material-2.pdf]

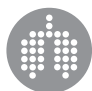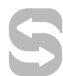

SHAREABLE PDF

# Effects of suboptimal adherence of CPAP therapy on symptoms of obstructive sleep apnoea: a randomised, double-blind, controlled trial

Thomas Gaisl <sup>1,5</sup>, Protazy Rejmer<sup>1,5</sup>, Sira Thiel <sup>1</sup>, Sarah R. Haile <sup>2</sup>, Martin Osswald <sup>1</sup>, Malgorzata Roos <sup>2</sup>, Konrad E. Bloch <sup>1</sup>, John R. Stradling <sup>3</sup> and Malcolm Kohler<sup>1,4</sup>

**Affiliations:** <sup>1</sup>Dept of Pulmonology, University Hospital Zurich, Zurich, Switzerland. <sup>2</sup>Epidemiology, Biostatistics, and Prevention Institute, University of Zurich, Zurich, Switzerland. <sup>3</sup>National Institute for Health Research (NIHR), Oxford Biomedical Research Centre based at Oxford University Hospitals NHS Foundation Trust and University of Oxford, Oxford, UK. <sup>4</sup>Centre for Interdisciplinary Sleep Research, University of Zurich, Zurich, Switzerland. <sup>5</sup>Both authors contributed equally.

**Correspondence:** Malcolm Kohler, Chair of Respiratory Medicine, University Hospital Zurich, Rämistrasse 100, 8091 Zurich, Switzerland. E-mail: malcolm.kohler@usz.ch

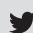

@ERSpublications

**Patients with obstructive sleep apnoea and daytime sleepiness are still getting a substantial benefit from suboptimal CPAP adherence (i.e. 3–4 h per night), albeit not as much as they might get if they adhered more** <http://bit.ly/2Phgeo2>

**Cite this article as:** Gaisl T, Rejmer P, Thiel S, *et al.* Effects of suboptimal adherence of CPAP therapy on symptoms of obstructive sleep apnoea: a randomised, double-blind, controlled trial. *Eur Respir J* 2020; 55: 1901526 [https://doi.org/10.1183/13993003.01526-2019].

This single-page version can be shared freely online.

## ABSTRACT

**Introduction:** Continuous positive airway pressure (CPAP) is currently the treatment of choice for sleepiness in patients with obstructive sleep apnoea (OSA); however, adherence is often thought to be suboptimal. We investigated the effects of suboptimal CPAP usage on objective and subjective sleepiness parameters in patients with OSA.

**Material and methods:** In this 2-week, parallel, double-blind, randomised controlled trial we enrolled moderate-to-severe OSA patients with excessive pre-treatment daytime sleepiness (Epworth sleepiness scale (ESS) score >10 points) who had suboptimal CPAP adherence over ≥12 months (mean nightly usage time 3–4 h). Patients were allocated through minimisation to either subtherapeutic CPAP (“sham CPAP”) or continuation of CPAP (“therapeutic CPAP”). A Bayesian analysis with historical priors calculated the posterior probability of superiority.

**Results:** Between May, 2016 and November, 2018, 57 patients (aged 60±8 years, 79% male, 93% Caucasian) were allocated in total, and 52 who completed the study (50% in each arm) were included in the final analysis. The unadjusted ESS score increase was 2.4 points (95% CI 0.6–4.2, p=0.01) in the sham-CPAP group when compared to continuing therapeutic CPAP. The probability of superiority of therapeutic CPAP over sham CPAP was 90.4% for ESS, 90.1% for systolic blood pressure and 80.3% for diastolic blood pressure.

**Conclusions:** Patients with moderate-to-severe OSA and daytime sleepiness are still getting a substantial benefit from suboptimal CPAP adherence, albeit not as much as they might get if they adhered more. Whether a similar statement can be made for even lower adherence levels remains to be established in future trials.
